# Supplementary material for: Patient Perceptions and Potential Utility of Pharmacogenetic Testing in Chronic Pain Management and Opioid Use Disorder in the Camden Opioid Research Initiative
Source: Pharmaceutics. 2022 Sep 3;14(9):1863. doi: 10.3390/pharmaceutics14091863 (PMC9505214; doi:10.3390/pharmaceutics14091863)
Supplement: Supplementary file 1 [file pharmaceutics-14-01863-s001.zip]

Archive with 4 entries (4 files):
- Kusic_et_al_FigureS1.pdf
- Kusic_et_al_FigureS2.pdf
- Kusic_et_al_Sup_figure_legends.pdf
- Kusic_et_al_TableS1.pdf
