# Supplementary figures and images for: Patient Perceptions and Potential Utility of Pharmacogenetic Testing in Chronic Pain Management and Opioid Use Disorder in the Camden Opioid Research Initiative
Source: MDPI journal article supplement (doi:10.3390/pharmaceutics14091863), 2022-09-03

# CYP3A4 rs2740574 genotype

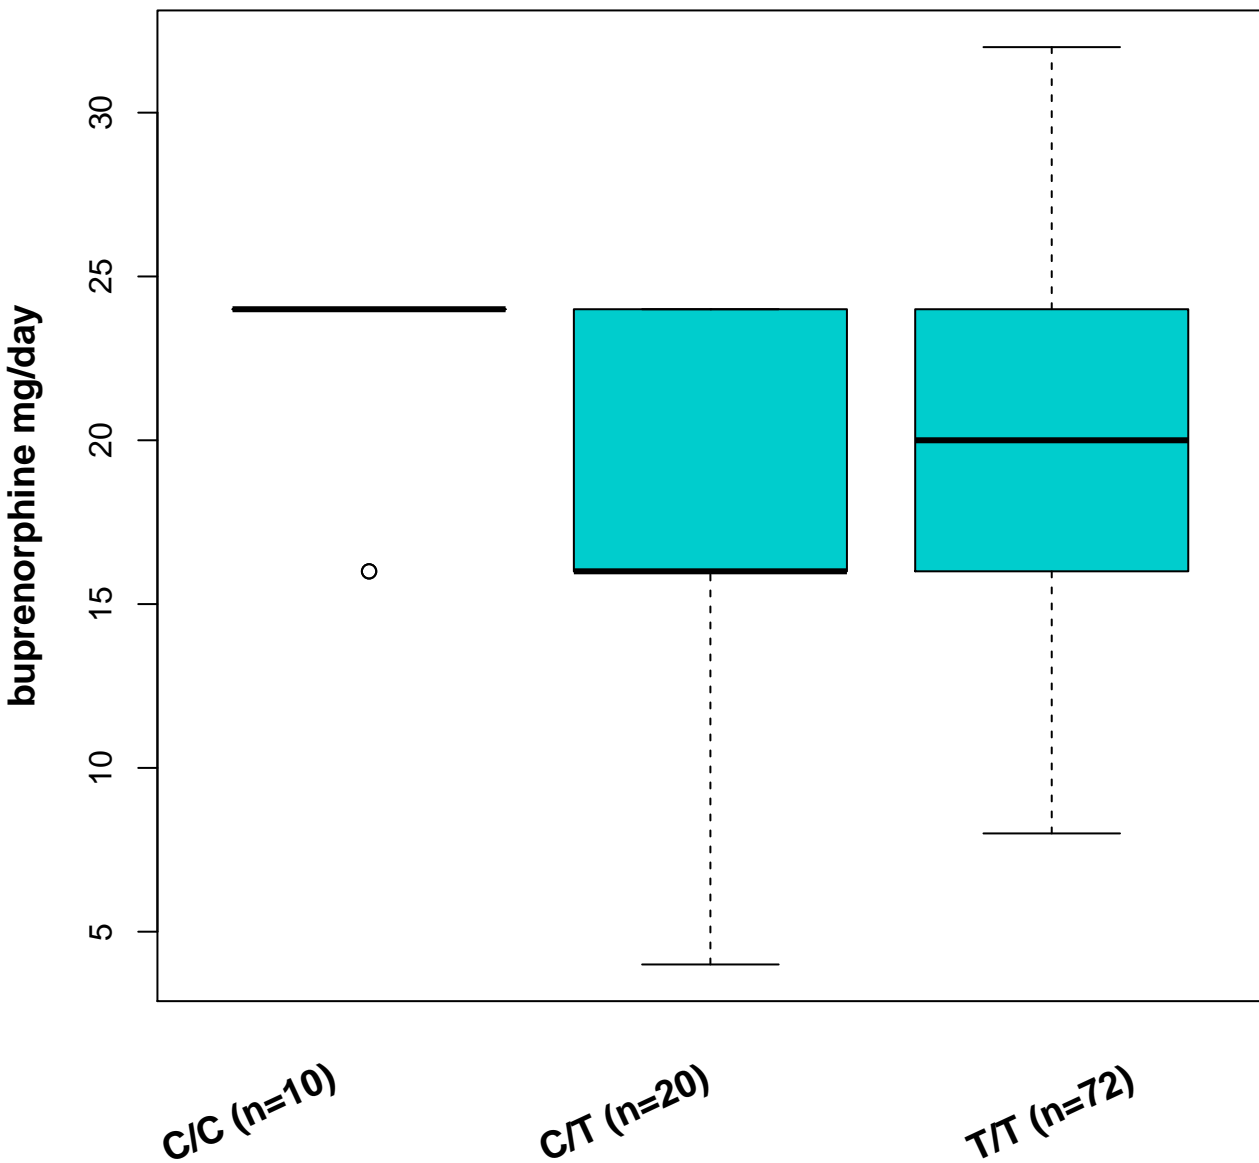

Supplement: s1 [file s1]

# OPRM1 rs1799971 genotype

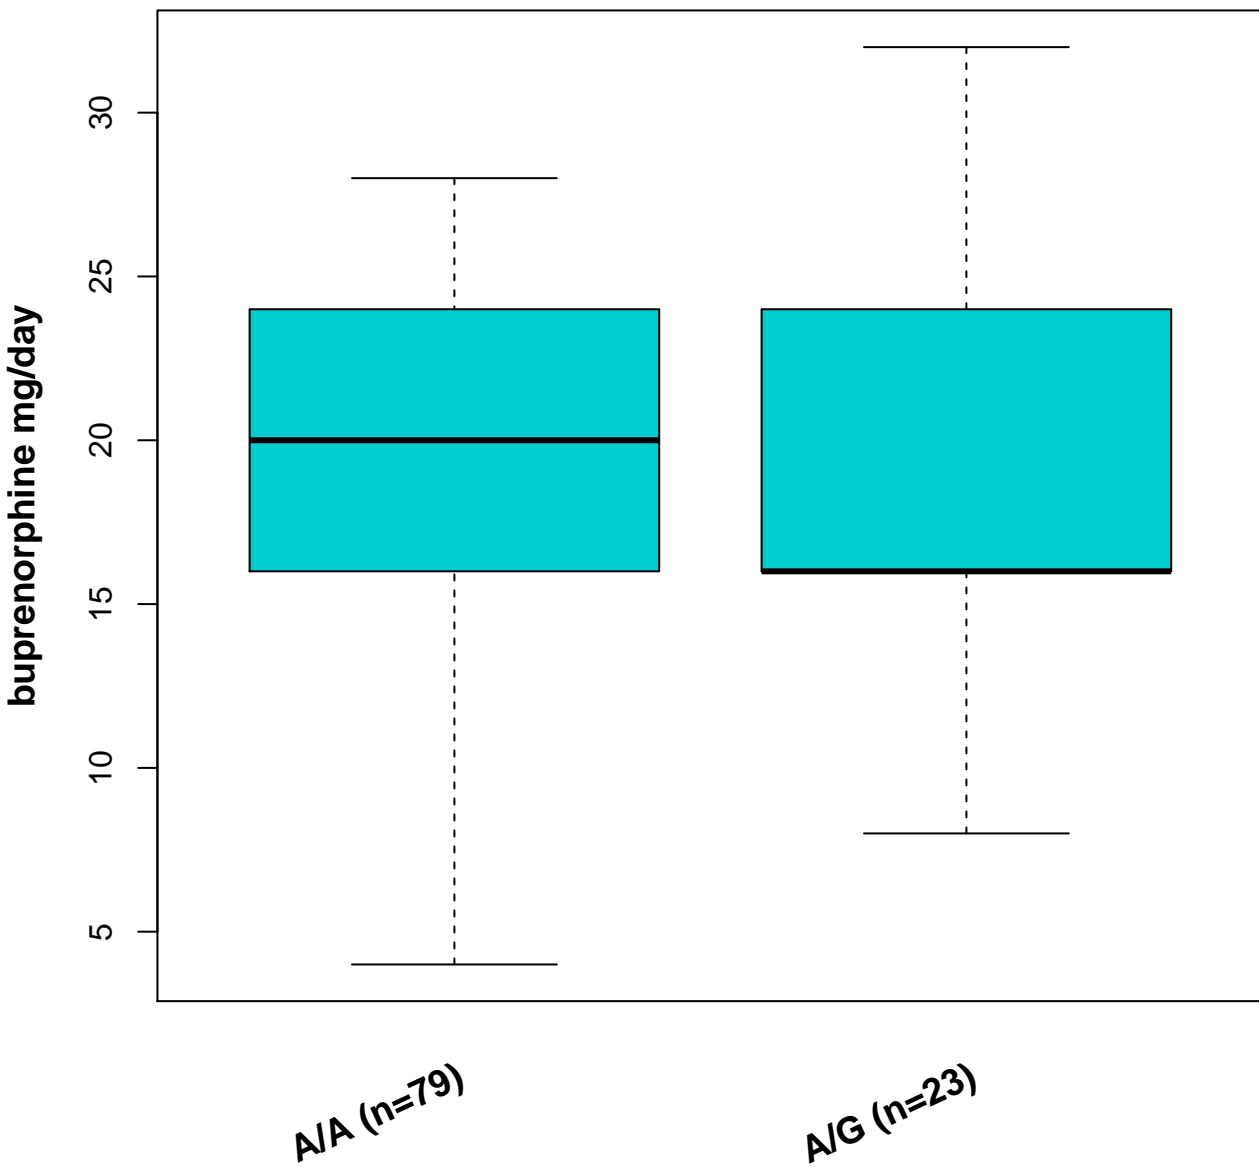

Supplement: s1 [file s1]
